# Supplementary material for: Multi-layered heterogeneous interfaces created in Co0.85Se@Ni3S4/NF to enhance supercapacitor performances by multi-step alternating electrodeposition
Source: Royal Society of Chemistry journal article supplement (doi:10.1039/d4dt01118j), 2024-01-01
Supplement: d4dt01118j1.pdf [file d4dt01118j1.pdf]

## Supporting information

### **Multi-layered Heterogeneous Interfaces Created in Co<sub>0.85</sub>Se@Ni<sub>3</sub>S<sub>4</sub>/NF to Enhance Supercapacitor Performances by Multi-step Alternating Electrodeposition**

Chunyan Zhang,<sup>a</sup> Jinkun Yang,<sup>a</sup> Hang Li,<sup>a</sup> Mengfei Su,<sup>a</sup> Boru Xiong,<sup>b</sup> Feng Gao,<sup>b</sup> and Qingyi Lu<sup>a</sup>

<sup>a</sup> State Key Laboratory of Coordination Chemistry, Coordination Chemistry Institute, Collaborative Innovation Center of Advanced Microstructures, School of Chemistry and Chemical Engineering, Nanjing University, Nanjing 210023, P. R. China. E-mail: qylu@nju.edu.cn

<sup>b</sup> Department of Materials Science and Engineering, Jiangsu Key Laboratory of Artificial Functional Materials, Collaborative Innovation Center of Advanced Microstructures, College of Engineering and Applied Sciences, Nanjing University, Nanjing 210023, P. R. China. E-mail: fgao@nju.edu.cn

### Synthesis of PPy

Polypyrrole (PPy) was synthesized via an electrodeposition process by galvanostatic method carried out on a CHI660E electrochemical workstation with carbon cloth as the working electrode, an Ag/AgCl, KCl (saturated) electrode as the reference electrode and a Pt sheet (1.2 cm×1.2 cm) as the counter electrode. The typical deposition was performed in a mixed solution of 0.01 mmol SDBS (sodium dodecyl benzene sulfonate) and 0.15 mmol pyrrole monomer by galvanostatic method with a potential of 1 V for 800 seconds.

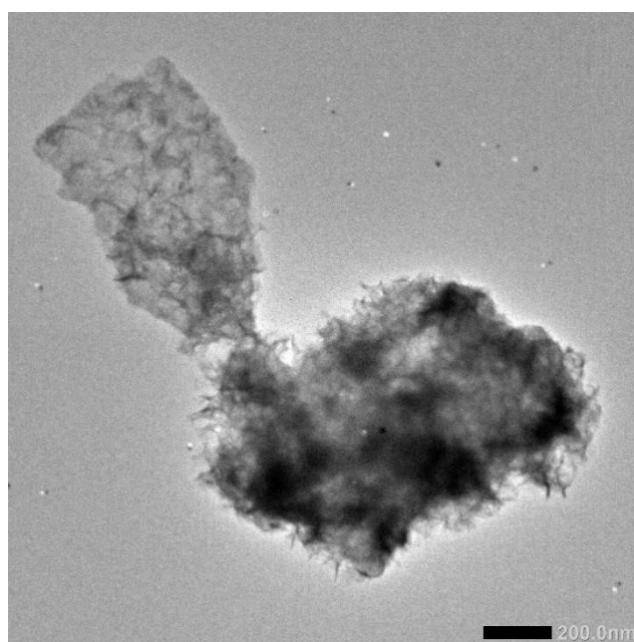

**Fig. S1** The TEM image of 8L-Co<sub>0.85</sub>Se@Ni<sub>3</sub>S<sub>4</sub>@NF

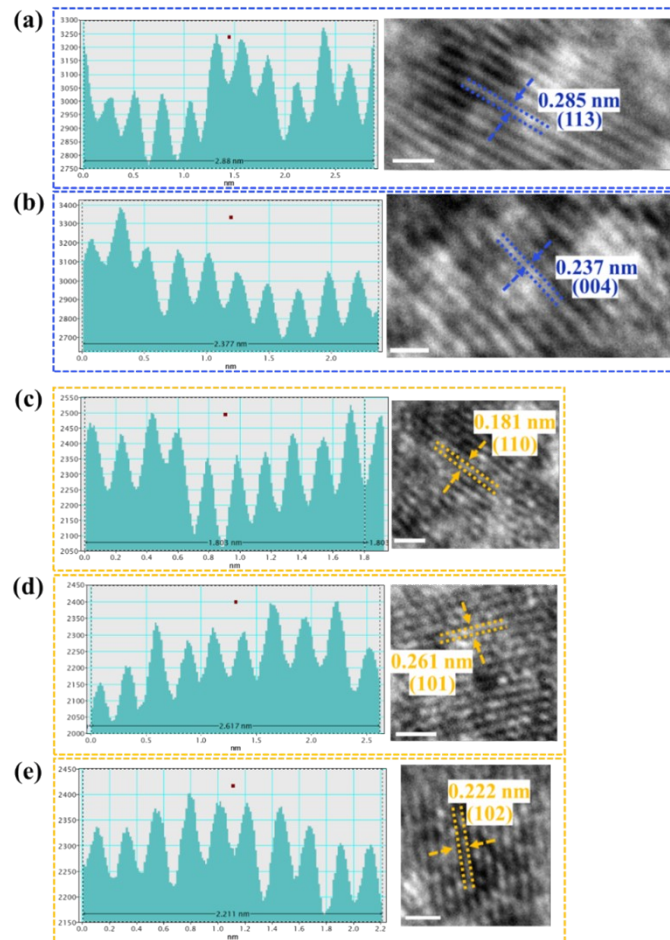

**Fig. S2** HRTEM and corresponding IFFT images for  $\text{Ni}_3\text{S}_4$  and  $\text{Co}_{0.85}\text{Se}$  in Fig. 3b: (a) (113) and (b) (004) planes of  $\text{Ni}_3\text{S}_4$ ; (c) (110), (d) (101) and (e) (102) planes of  $\text{Co}_{0.85}\text{Se}$ . The scale bar is 0.5 nm.

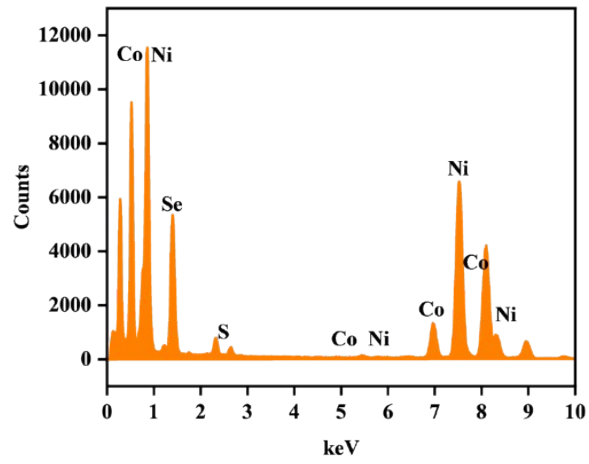

Fig. S3 EDS spectrum of 8L-Co<sub>0.85</sub>Se@Ni<sub>3</sub>S<sub>4</sub>/NF

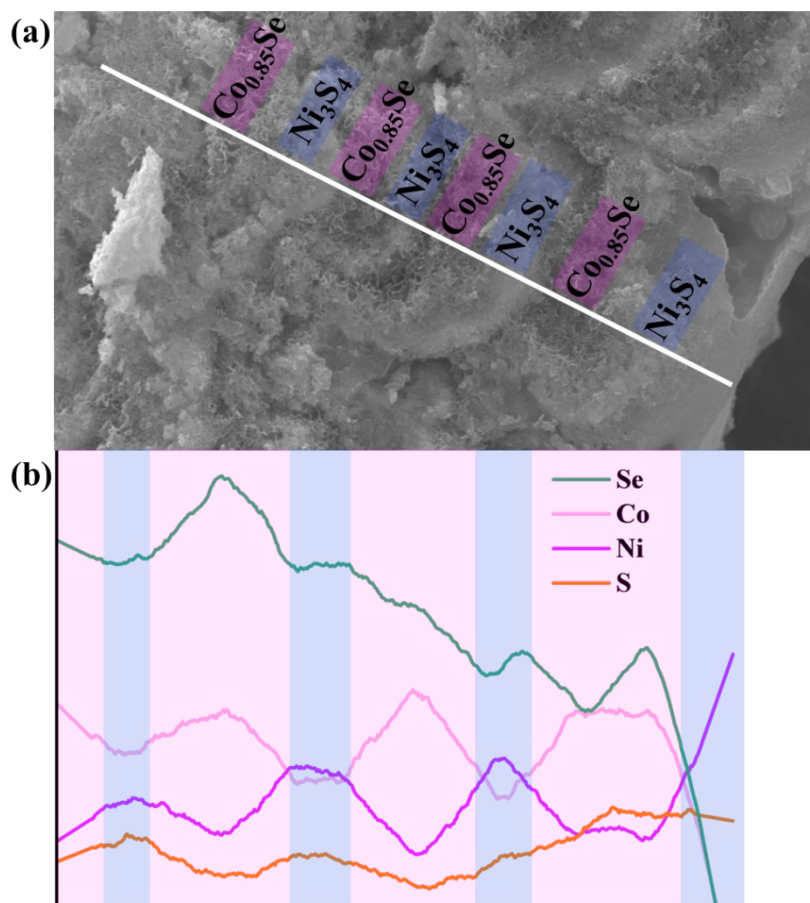

Fig. S4 SEM image and cross-section linear scanning EDS spectrum of 8L-Co<sub>0.85</sub>Se@Ni<sub>3</sub>S<sub>4</sub>/NF.

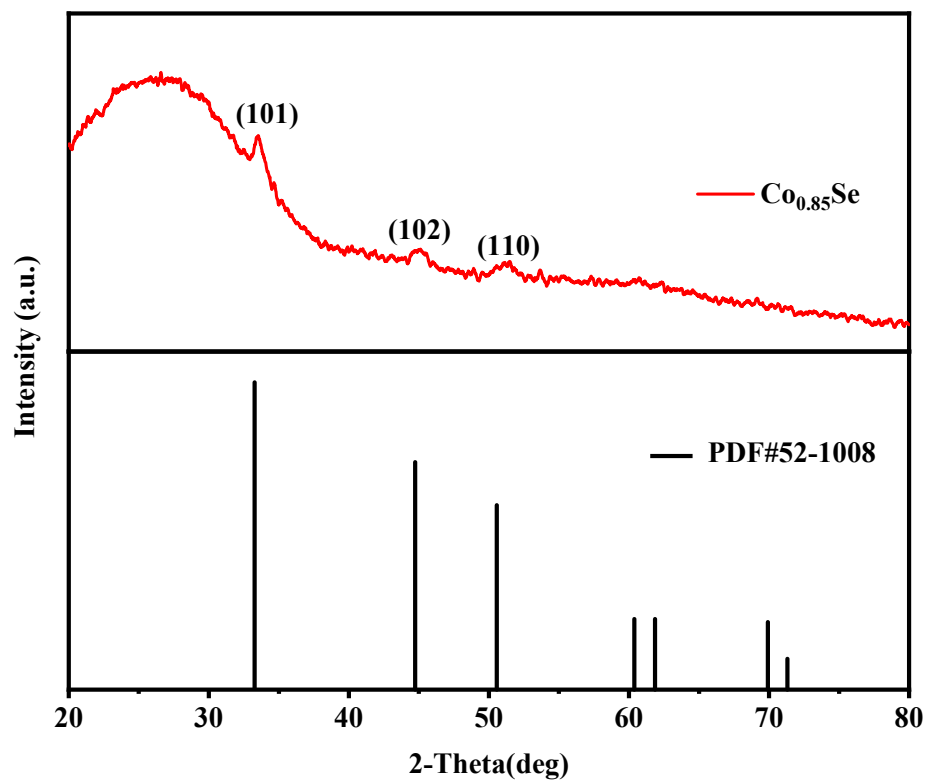

Fig. S5 XRD pattern of 1L-Co<sub>0.85</sub>Se

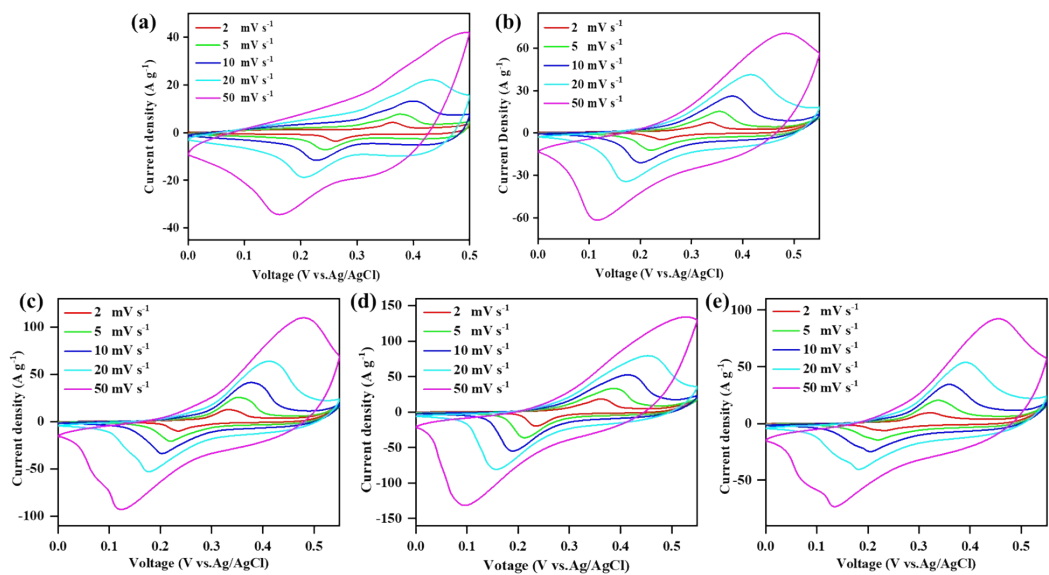

**Fig. S6** CV curves of (a) 1L-Co<sub>0.85</sub>Se@NF, (b) 2L-Co<sub>0.85</sub>Se@Ni<sub>3</sub>S<sub>4</sub>/NF, (c) 4L-Co<sub>0.85</sub>Se@Ni<sub>3</sub>S<sub>4</sub>/NF, (d) 6L-Co<sub>0.85</sub>Se@Ni<sub>3</sub>S<sub>4</sub>/NF and (e) CoSeNiS/NF electrodes at scan rates from 2 to 50 mV s<sup>-1</sup>.

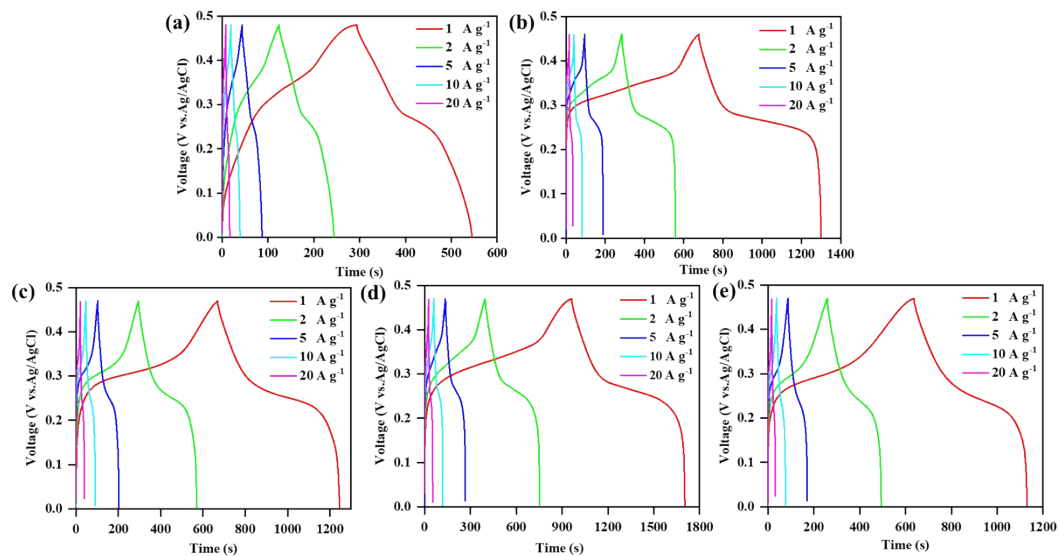

**Fig. S7** GCD curves of (a) 1L-Co<sub>0.85</sub>Se@NF, (b) 2L-Co<sub>0.85</sub>Se@Ni<sub>3</sub>S<sub>4</sub>/NF, (c) 4L-Co<sub>0.85</sub>Se@Ni<sub>3</sub>S<sub>4</sub>/NF, (d) 6L-Co<sub>0.85</sub>Se@Ni<sub>3</sub>S<sub>4</sub>/NF and (e) CoSeNiS/NF electrodes at different current densities of 1 A g<sup>-1</sup>, 2 A g<sup>-1</sup>, 5 A g<sup>-1</sup>, 10 A g<sup>-1</sup> and 20 A g<sup>-1</sup>.



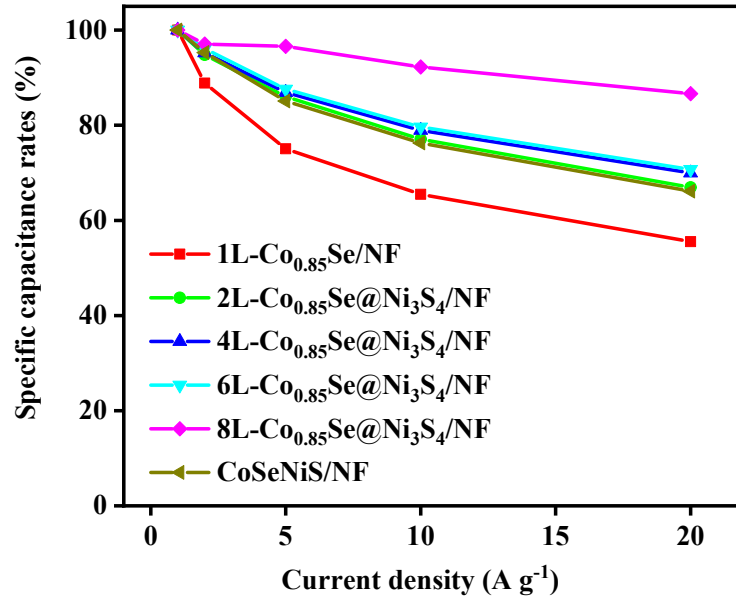

Fig. S8 Capacitance retentions rates of different electrodes at different current densities.

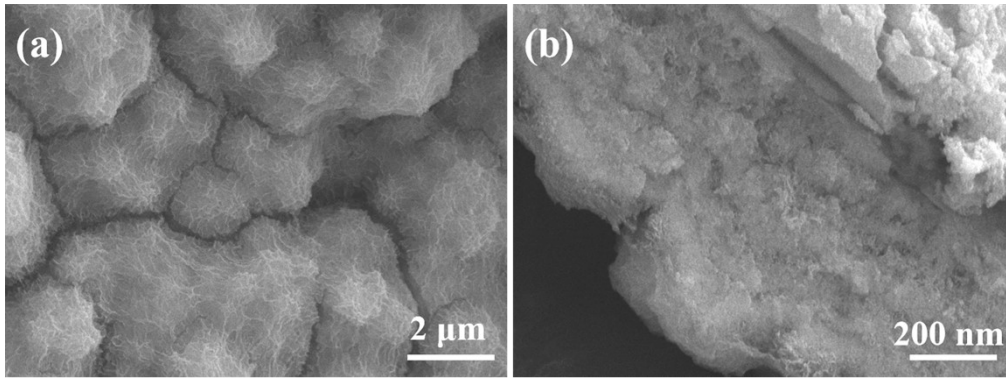

**Fig. S9** SEM images of 8L-Co<sub>0.85</sub>Se@Ni<sub>3</sub>S<sub>4</sub>@NF after cycling 5000 cycles.

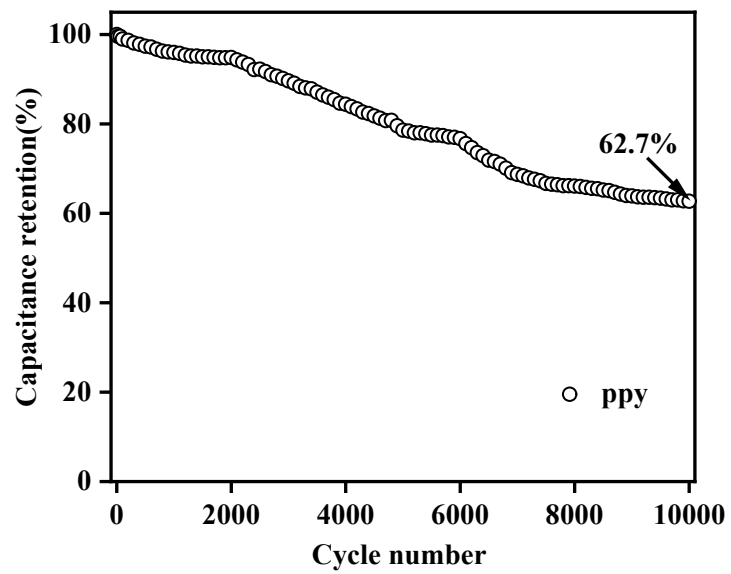

Fig. S10 Cycle retention test of ppy/NF

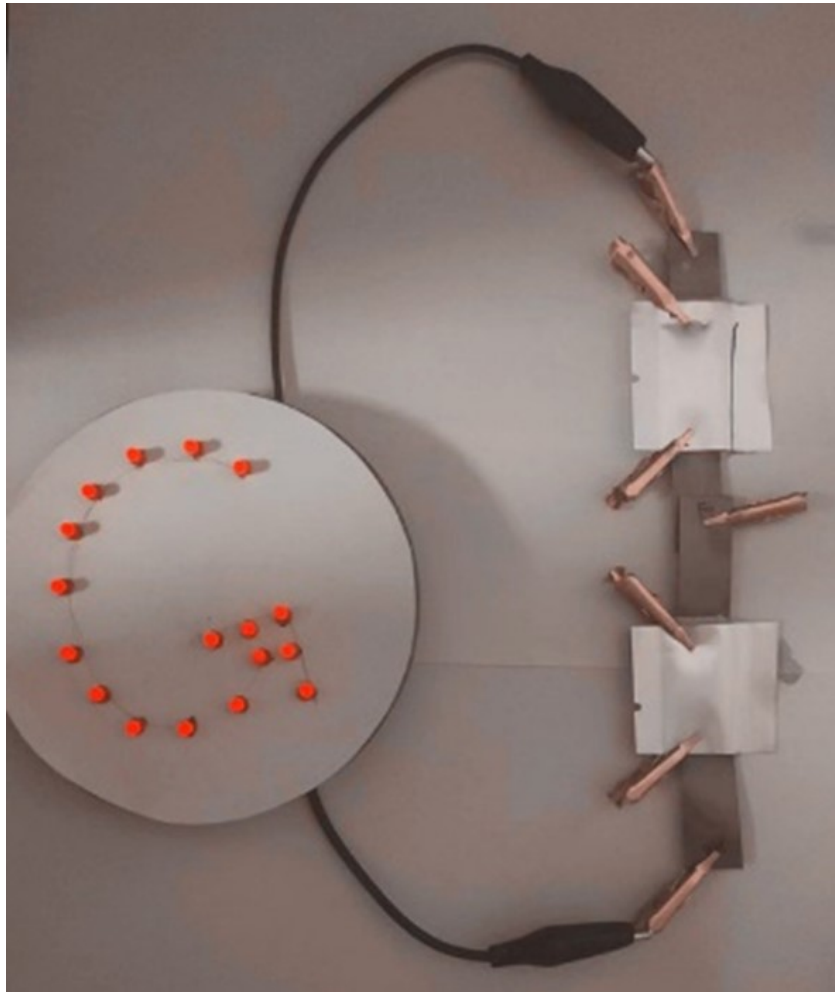

**Fig. S11** Lighting 17 LED lights by two ASC devices connected in series.

**Table S1** Element contents from EDS analysis of 8L-Co<sub>0.85</sub>Se@Ni<sub>3</sub>S<sub>4</sub>/NF

| Element | Weight (%) | Atomic |
|---------|------------|--------|
| S       | 18.28      | 0.35   |
| Co      | 22.09      | 0.23   |
| Ni      | 24.87      | 0.26   |
| Se      | 34.76      | 0.27   |

**Table. S2** Electrochemical performances comparisons of 8L-Co<sub>0.85</sub>Se@Ni<sub>3</sub>S<sub>4</sub> with the recently reported CoSe-based and/or Ni<sub>3</sub>S<sub>4</sub>-based materials.

| <b>Materials</b>                                                    | <b>Specific Capacitance</b>                      | <b>References</b>                                               |
|---------------------------------------------------------------------|--------------------------------------------------|-----------------------------------------------------------------|
| 8L-Co <sub>0.85</sub> Se@Ni <sub>3</sub> S <sub>4</sub> /NF         | 1558.33 F g <sup>-1</sup> at 1 A g <sup>-1</sup> | This work                                                       |
| CoFe <sub>2</sub> Se <sub>4</sub> @CoNi-CH                          | 1288.89 F g <sup>-1</sup> at 1 A g <sup>-1</sup> | <i>J. Colloid Interface Sci.</i> 2022, <b>621</b> , 149-159.    |
| Ni <sub>9</sub> S <sub>8</sub> @Ni <sub>2</sub> B                   | 1555.33 F g <sup>-1</sup> at 1 A g <sup>-1</sup> | <i>J. Colloid Interface Sci.</i> 2023, <b>649</b> , 815-825.    |
| NiMo <sub>3</sub> S <sub>4</sub> /BP                                | 830 F g <sup>-1</sup> at 1 A g <sup>-1</sup>     | <i>Small</i> 2024, <b>20</b> , 2310120                          |
| V-Ni <sub>3</sub> S <sub>2</sub>                                    | 1448.4 F g <sup>-1</sup> at 1 A g <sup>-1</sup>  | <i>J. Colloid. Interface Sci.</i> 2023, <b>629</b> , 1049-1060. |
| CoSe <sub>2</sub> /NiSe <sub>2</sub>                                | 1302.5 F g <sup>-1</sup> at 1 A g <sup>-1</sup>  | <i>J. Electroanal. Chem.</i> 2021, <b>895</b> , 115479.         |
| Ni <sub>x</sub> Se <sub>y</sub>                                     | 1025 F g <sup>-1</sup> at 1 A g <sup>-1</sup>    | <i>J. Electroanal. Chem.</i> 2021, <b>895</b> , 115479.         |
| (Ni,Co)Se <sub>2</sub> -T                                           | 1412.5 F g <sup>-1</sup> at 1 A g <sup>-1</sup>  | <i>Electrochim. Acta</i> 2021, <b>393</b> , 139049.             |
| Ni <sub>3</sub> S <sub>2</sub> /Co <sub>9</sub> S <sub>8</sub> /C-2 | 1195 F g <sup>-1</sup> at 1 A g <sup>-1</sup>    | <i>Appl. Surf. Sci.</i> 2022, <b>574</b> , 151727.              |

**Table S3** Comparison table of the other identical ASCs with Co<sub>0.85</sub>Se@Ni<sub>3</sub>S<sub>4</sub>/NF//PPy/NF ASC

| Materials                                                        | Energy density and power density                      | Ref                                                    |
|------------------------------------------------------------------|-------------------------------------------------------|--------------------------------------------------------|
| Co <sub>0.85</sub> Se@Ni <sub>3</sub> S <sub>4</sub> /NF//PPy/NF | 76.98 Wh kg <sup>-1</sup> at 775 W kg <sup>-1</sup>   | This work                                              |
| NiCo <sub>2</sub> S <sub>4</sub> @HCs//AC                        | 69.6 Wh kg <sup>-1</sup> at 847 W kg <sup>-1</sup>    | <i>Adv. Funct. Mater.</i> 2023, <b>33</b> , 2210238    |
| FCNS-2//AC                                                       | 50 Wh kg <sup>-1</sup> at 1.353 kW kg <sup>-1</sup>   | <i>Appl. Surf. Sci.</i> 2023, <b>611</b> , 155568      |
| CoNiMn-S//RGO                                                    | 42.1 Wh kg <sup>-1</sup> at 750 W kg <sup>-1</sup>    | <i>Chem. Eng. J.</i> 2021, <b>405</b> , 126928         |
| Ni <sub>3</sub> S <sub>4-x</sub> //AC                            | 33.1 Wh kg <sup>-1</sup> at 1.680 kW kg <sup>-1</sup> | <i>Small</i> 2022, <b>18</b> , 2106074                 |
| NiCo <sub>2</sub> S <sub>4</sub> //AC                            | 21.4 Wh kg <sup>-1</sup> at 1.663 kW kg <sup>-1</sup> | <i>Mater. Res. Bull.</i> 2023, <b>157</b> , 112036     |
| NiS/CNFs-2//AC                                                   | 22.4 Wh kg <sup>-1</sup> at 680 W kg <sup>-1</sup>    | <i>ACS Appl. Nano Mater.</i> 2022, <b>5</b> , 6192     |
| NiMoS <sub>4</sub> /NiS <sub>2</sub> //NCO                       | 38.6 Wh kg <sup>-1</sup> at 958.6 W kg <sup>-1</sup>  | <i>Chem. Eng. J.</i> 2022, <b>435</b> , 135231         |
| HCS//Co <sub>0.85</sub> Se@CoNi <sub>2</sub> S <sub>4</sub> /GF  | 46.5 W h kg <sup>-1</sup> at 750 W kg <sup>-1</sup>   | <i>J. Mater. Chem. A</i> 2018, <b>6</b> , 15630-15639. |
| Ni-Co-S/GF//PPy/GF                                               | 46.5 W h kg <sup>-1</sup> at 825.0 W kg <sup>-1</sup> | <i>Adv. Sci.</i> 2018, <b>5</b> , 1700375              |

**Table S4** The cycle numbers corresponding to different electrochemical deposition layers

| <b>Layer numbers</b> | <b>Sample/<br/>cycle numbers</b> |                                      |                             |                                      |                             |                                      |                             |                                      |
|----------------------|----------------------------------|--------------------------------------|-----------------------------|--------------------------------------|-----------------------------|--------------------------------------|-----------------------------|--------------------------------------|
| 1                    | Co <sub>0.85</sub> Se<br>/8      |                                      |                             |                                      |                             |                                      |                             |                                      |
| 2                    | Co <sub>0.85</sub> Se<br>/4      | Ni <sub>3</sub> S <sub>4</sub><br>/4 |                             |                                      |                             |                                      |                             |                                      |
| 4                    | Co <sub>0.85</sub> Se<br>/2      | Ni <sub>3</sub> S <sub>4</sub><br>/2 | Co <sub>0.85</sub> Se<br>/2 | Ni <sub>3</sub> S <sub>4</sub><br>/2 |                             |                                      |                             |                                      |
| 6                    | Co <sub>0.85</sub> Se<br>/2      | Ni <sub>3</sub> S <sub>4</sub><br>/2 | Co <sub>0.85</sub> Se<br>/1 | Ni <sub>3</sub> S <sub>4</sub><br>/1 | Co <sub>0.85</sub> Se<br>/1 | Ni <sub>3</sub> S <sub>4</sub><br>/1 |                             |                                      |
| 8                    | Co <sub>0.85</sub> Se<br>/1      | Ni <sub>3</sub> S <sub>4</sub><br>/1 | Co <sub>0.85</sub> Se<br>/1 | Ni <sub>3</sub> S <sub>4</sub><br>/1 | Co <sub>0.85</sub> Se<br>/1 | Ni <sub>3</sub> S <sub>4</sub><br>/1 | Co <sub>0.85</sub> Se<br>/1 | Ni <sub>3</sub> S <sub>4</sub><br>/1 |
